# Supplementary material for: Neuroanatomical bases of effortful control: evidence from a large sample of young healthy adults using voxel-based morphometry
Source: PubMed Central journal article supplement (PMC4977574; doi:10.1038/srep31231), 2016-08-09
Supplement: srep31231-s1.pdf [file srep31231-s1.pdf]

## Neuroanatomical bases of effortful control: evidence from a large sample of young healthy adults using voxel-based morphometry

Rui Nouchi<sup>a,b</sup>, Hikaru Takeuchi<sup>c</sup>, Yasuyuki Taki<sup>c,d,e</sup>, Atsushi Sekiguchi<sup>e,f</sup>, Yuka Kotozaki<sup>b</sup>, Seishu Nakagawa<sup>g</sup>, Carlos Makoto Miyauchi<sup>h</sup>, Kunio Iizuka<sup>g,i</sup>, Ryoichi Yokoyama<sup>j,k</sup>, Takamitsu Shinada<sup>g</sup>, Yuki Yamamoto<sup>g</sup>, Sugiko Hanawa<sup>g</sup>, Tsuyoshi Araki<sup>b</sup>, Yuko Sassa<sup>c</sup>, Ryuta Kawashima<sup>b, c, g</sup>

<sup>a</sup>*Creative Interdisciplinary Research Division, Frontier Research Institute for Interdisciplinary Science (FRIS), Tohoku University, Seiryomachi 4-1, Sendai 980-8575, Japan*

<sup>b</sup>*Smart Ageing International Research Center, Institute of Development, Aging and Cancer, Tohoku University, Sendai, Japan*

<sup>c</sup>*Division of Developmental Cognitive Neuroscience, Institute of Development, Aging and Cancer, Tohoku University, Sendai, Japan*

<sup>d</sup>*Department of Nuclear Medicine and Radiology, Institute of Development, Aging and Cancer, Tohoku University, Sendai, Japan*

<sup>e</sup>*Division of Medical Neuroimaging Analysis, Department of Community Medical Supports, Tohoku Medical Megabank Organization, Tohoku University, Sendai, Japan*

<sup>f</sup>*Department of Adult Mental Health, National Institute of Mental Health, National Center of Neurology and Psychiatry, 4-1-1 Ogawa-Higashi, Kodaira, Tokyo 187-8553, Japan*

<sup>g</sup>*Department of Functional Brain Imaging, Institute of Development, Aging and Cancer, Tohoku University, Sendai, Japan*

<sup>h</sup>*Graduate Schools for Law and Politics, The University of Tokyo, Tokyo, Japan*

<sup>i</sup>*Department of Psychiatry, Tohoku University Graduate School of Medicine, Sendai, Japan*

<sup>j</sup>*Japan Society for the Promotion of Science, Tokyo, Japan*

<sup>k</sup>*Faculty of Medicine, Kobe University, 7-5-Ikusunoki-cho, Kobe, 950-0017 Japan*

**Corresponding author:**

Rui Nouchi, Ph. D, Assistant Professor

Creative Interdisciplinary Research Division,

Frontier Research Institute for Interdisciplinary Science (FRIS), Tohoku University

Seiryomachi 4-1, Aoba-ku, Sendai 980-8575, Japan

Tel/Fax: +81-22-717-7988

E-mail: rui.nouchi.a4@tohoku.ac.jp

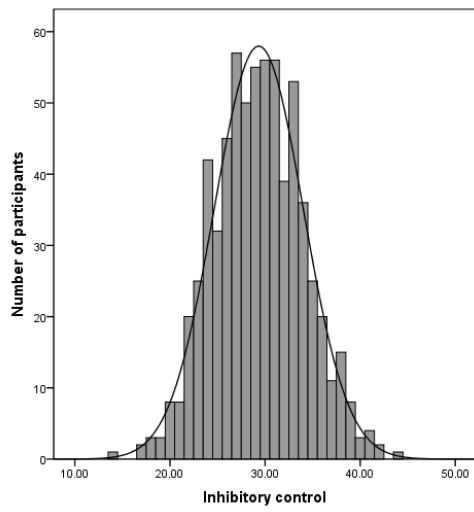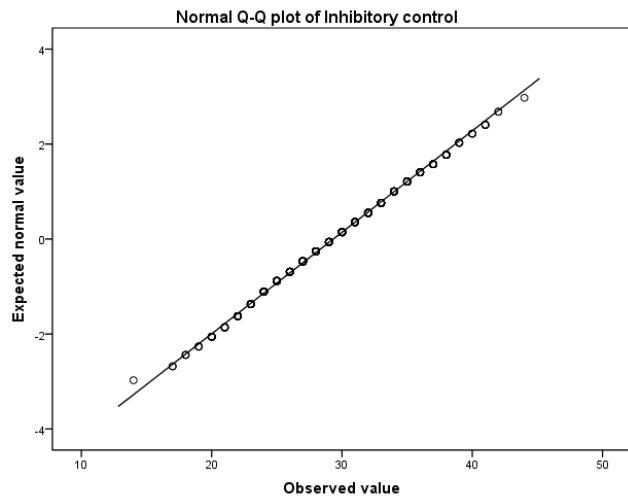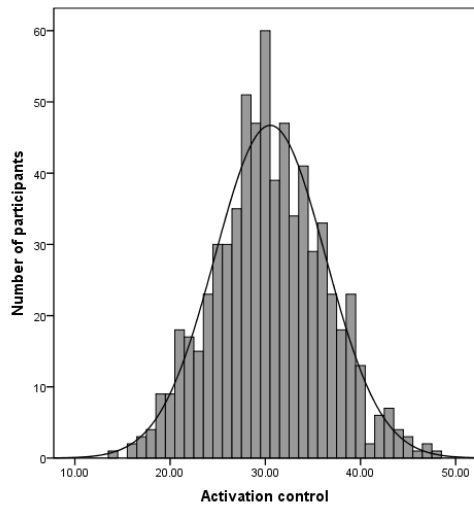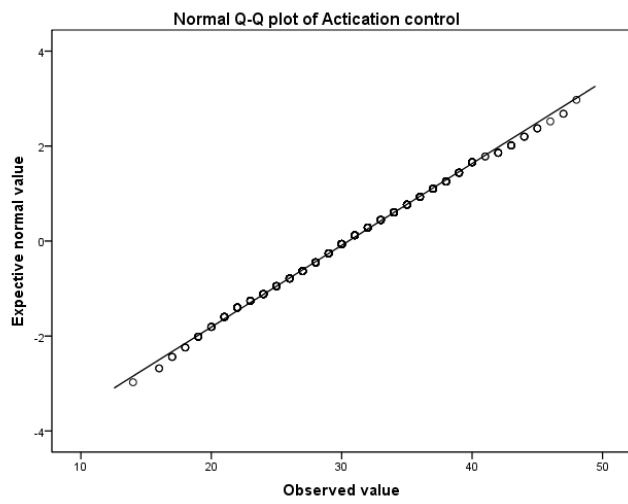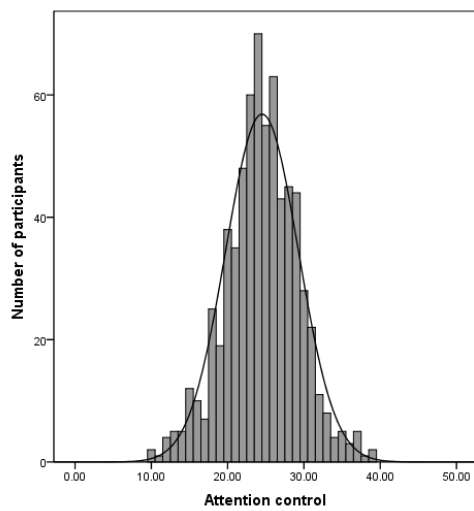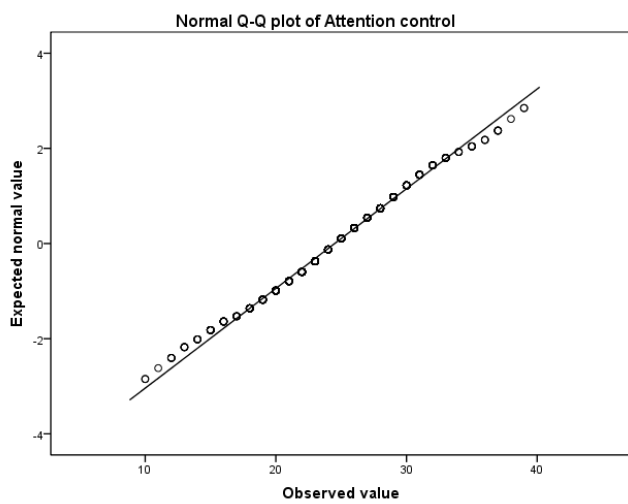

Figure S1. Histograms and Quantile-Quantile in inhibitory control (top), activation control (middle), and attention control (bottom).
